# Supplementary material
Source: Springer Nature journal article supplement (https://www.springermedizin.de/resource/supplementary/12906_2012_1345_MOESM3_ESM.pdf/9522516)

A

- CTRL
- AMO (1/8 x MIC)
- AMO (1/8 x MIC) + FC111 (MIC)
- \* FC111 (MIC)

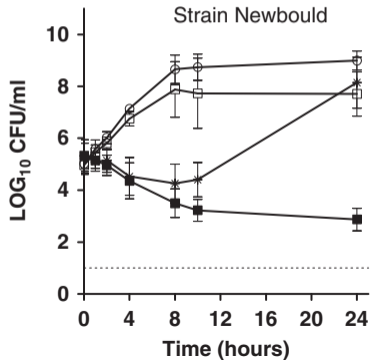

B

- CTRL
- OXA (1/512 x MIC)
- OXA (1/512 x MIC) + FC111 (MIC)
- \* FC111 (MIC)

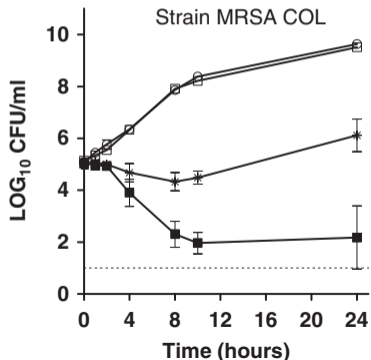

Supplement: MOESM3 [file 9522516]
